# Supplementary material for: Short term, low dose alpha-ketoglutarate based polymeric nanoparticles with methotrexate reverse rheumatoid arthritis symptoms in mice and modulate T helper cell responses
Source: Royal Society of Chemistry journal article supplement (doi:10.1039/d2bm00415a), 2022-01-01
Supplement: d2bm00415a1.pdf [file d2bm00415a1.pdf]

## Appendix A. Supplementary material

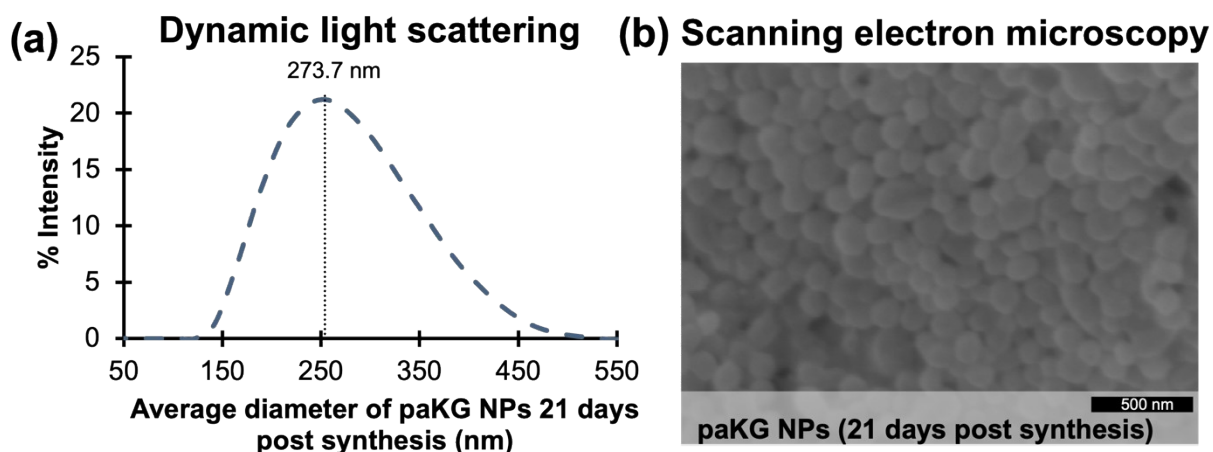

**Supplementary Figure 1: Characterization of paKG NPs 21 days post synthesis. (a)**

Dynamic light scattering data demonstrates the average diameter of nanoparticles that were stored in  $-20^{\circ}\text{C}$  for 21 days to be  $273.7 \pm 62.6$  nm ( $n = 3$ ; avg  $\pm$  SEM). Measurement was executed in DI H<sub>2</sub>O. **(b)** Scanning electron microscope images of paKG NPs with a gold sputter coating of  $\sim 15$  nm (nanoparticles were gold coated only for the purposes of imaging) continued to demonstrate a smooth and spherical surface morphology after being stored in  $-20^{\circ}\text{C}$  for 21 days (scale bar = 500 nm; magnification = 100,000x).

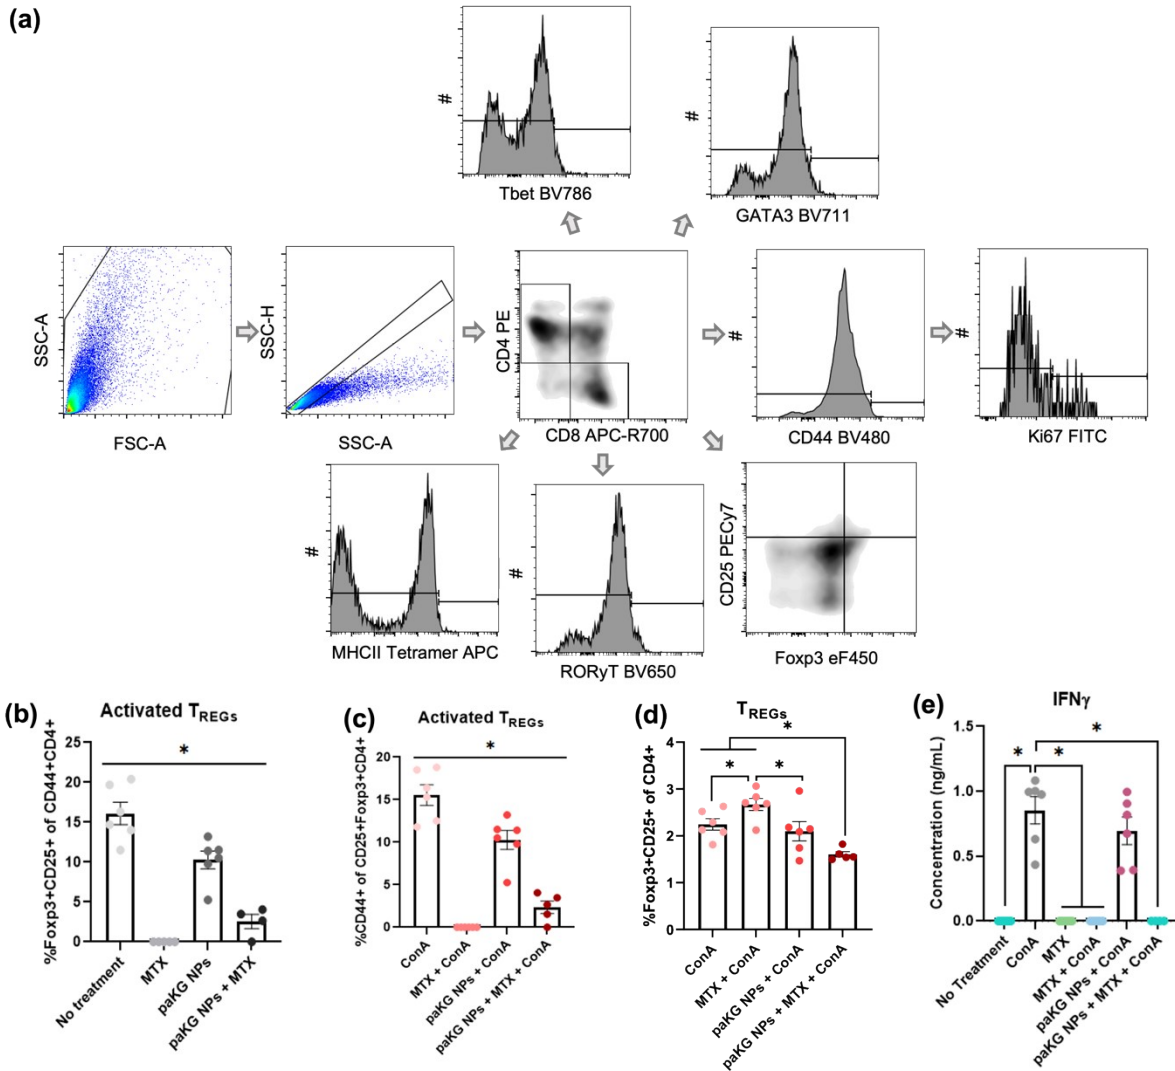

**Supplementary Figure 2: T cell flow cytometry schematic and *in vitro* T cell responses to paKG NPs + MTX. (a)** Representative schematic of T cell flow plot analysis. **(b-d)** Flow cytometry of *in vitro* splenic  $T_{REG}$  responses treated with a final well concentration of 1 mg/mL of methotrexate and/or 0.1 mg/mL of paKG nanoparticles and cultured in 37°C for 48-72 hrs in the absence or presence of ConA with a final well concentration of 2.5  $\mu$ g/mL, (b) Activated  $T_{REG}$ s without ConA (n= 4-6; avg  $\pm$  SEM; \* =  $p \leq 0.05$ ; two-tailed unpaired Student's t-test), (c)  $T_{REG}$ s with ConA (n= 4-6; avg  $\pm$  SEM; \* =  $p \leq 0.05$ ; One-Way ANOVA, Brown-Forsythe and

Welch ANOVA tests, unpaired t with Welch's correction), (d) Activated T<sub>REGs</sub> with ConA (n= 4-6; avg  $\pm$  SEM; \* =  $p \leq 0.05$ ; two-tailed unpaired Student's t-test), (e) Extracellular IFN $\gamma$  levels within *in vitro* supernatant of splenocyte cultures were quantified by ELISA (n= 4-9; avg  $\pm$  SEM; \* =  $p \leq 0.05$  as compared to ConA; two-tailed unpaired Student's t-test)

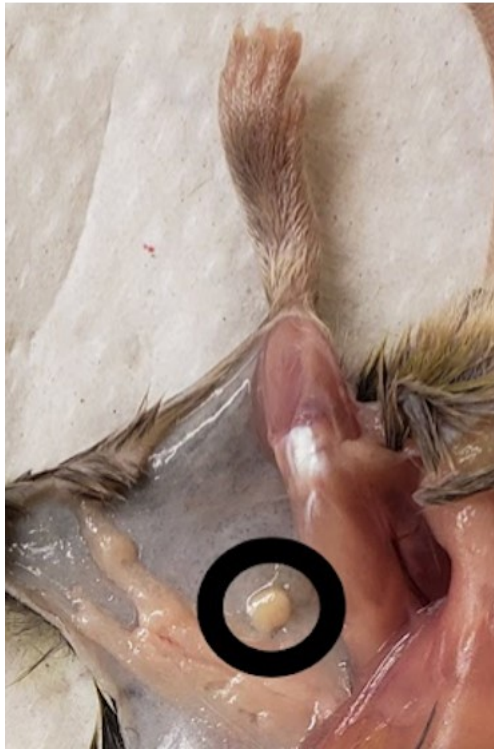

**Supplementary Figure 3: Representative injection site image.** The nanoparticle injection sites of mice were present when mice were euthanized on day 57 shown within a black circle.

|                      |              |                                                                                             |                                                                                             |                                                                                             |                                                                                             |                                                                                              |                                                                                               |                                                                                               |
|----------------------|--------------|---------------------------------------------------------------------------------------------|---------------------------------------------------------------------------------------------|---------------------------------------------------------------------------------------------|---------------------------------------------------------------------------------------------|----------------------------------------------------------------------------------------------|-----------------------------------------------------------------------------------------------|-----------------------------------------------------------------------------------------------|
| <b>Digits</b>        | <b>Right</b> | Points: 0  | Points: 0  | Points: 0  | Points: 0  | Points: 1  | Points: 2  | Points: 3  |
|                      | <b>Left</b>  | Points: 0  | Points: 0  | Points: 0  | Points: 1  | Points: 1  | Points: 2  | Points: 3  |
| <b>Mid-paw</b>       | <b>Right</b> | Points: 0  | Points: 1  | Points: 1  | Points: 0  | Points: 2  | Points: 2  | Points: 3  |
|                      | <b>Left</b>  | Points: 0  | Points: 0  | Points: 1  | Points: 2  | Points: 2  | Points: 2  | Points: 3  |
| <b>+</b>             |              |                                                                                             |                                                                                             |                                                                                             |                                                                                             |                                                                                              |                                                                                               |                                                                                               |
| <b>Sum of points</b> |              | <b>0</b>                                                                                    | <b>1</b>                                                                                    | <b>2</b>                                                                                    | <b>3</b>                                                                                    | <b>6</b>                                                                                     | <b>8</b>                                                                                      | <b>12</b>                                                                                     |
| <b>Scores</b>        |              | <b>0</b>                                                                                    | <b>1</b>                                                                                    | <b>2</b>                                                                                    | <b>3</b>                                                                                    | <b>4</b>                                                                                     | <b>5</b>                                                                                      | <b>6</b>                                                                                      |

**Supplementary Figure 4: Representative paw scoring photos.** The arthritic severity of mice was scored on a scale of 0-6 (see Table 1 for the points and scoring system that was utilized).

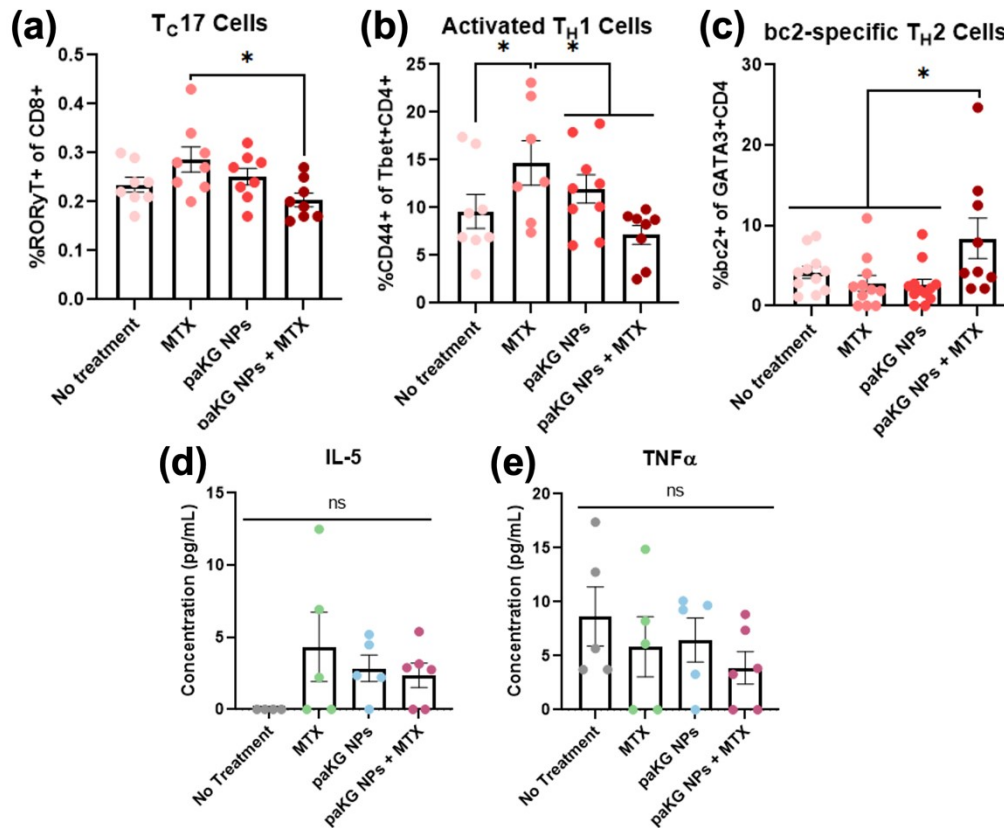

**Supplementary Figure 5: paKG NPs + MTX alter T cell responses *in vivo* but do not increase blood serum IL-5 and TNFα cytokine levels. (a-c)** Flow cytometry of *in vivo* T cell responses on day 57, (a) splenic T<sub>C</sub>17 cells, (b) splenic activated T<sub>H</sub>1 cells, (c) bc2-specific T<sub>H</sub>2 cells in the cervical lymph nodes (n = 6 mice; n = 2 replicates; avg ± SEM; \* = p ≤ 0.05; Ordinary one-way ANOVA, uncorrected Fisher's LSD, with a single pooled variance). **(d,e)** Multiplex luminex analysis of blood serum cytokine levels, (d) IL-5, (e) TNFα (n = 4 - 6; avg ± SEM; \* = p ≤ 0.05; One-Way ANOVA, Brown-Forsythe and Welch ANOVA tests, unpaired t with Welch's correction, with individual variances computed for each comparison).

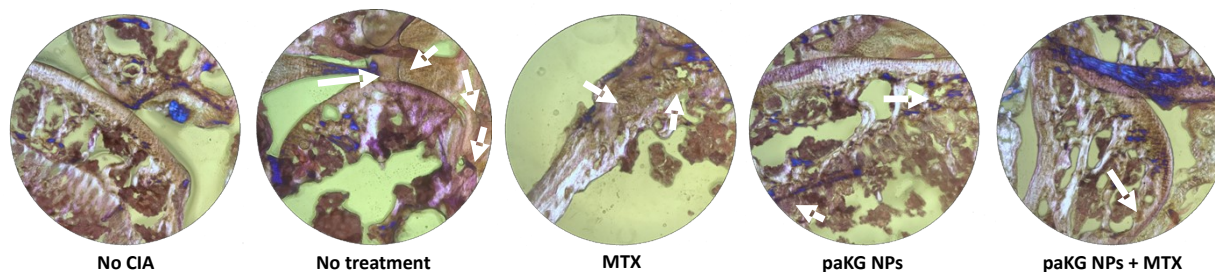

**Supplementary Figure 6: paKG NPs + MTX reduce infiltration of immune cells.**

Representative images of knee tissue with H&E staining is shown with white arrows showing cell infiltration. N = 3 biological replicates for no CIA, and N = 6 biological replicates for all other groups. Pink = Cytoplasm, Brown = drying artifact or blood, Blue = nuclei, and blue large splotches = artifact.
